# Supplementary material
Source: publisher figshare collection journal article supplement (https://asha.figshare.com/articles/dataset/_/20304144)
Supplement: Supplementary file 1 [file 1]

**Supplemental Material S2. Mean number of different words/words produced by age and story (*Good Dog, Carl* [GDC], *Picnic*).**

Mean number of words produced by age and story

|               | 20s   | 30s   | 40s   | 50s   | 60s   | 70s   | 80s   |
|---------------|-------|-------|-------|-------|-------|-------|-------|
| GDC           | 452.2 | 479.2 | 521.3 | 525.0 | 586.6 | 565.5 | 619.7 |
| <i>Picnic</i> | 476.8 | 477.6 | 523.6 | 550.5 | 598.2 | 582.7 | 581.5 |

Mean number of different words produced by age and story

|               | 20s   | 30s   | 40s   | 50s   | 60s   | 70s   | 80s   |
|---------------|-------|-------|-------|-------|-------|-------|-------|
| GDC           | 184.4 | 191.7 | 203.2 | 198.2 | 214.2 | 207.9 | 216.2 |
| <i>Picnic</i> | 188.0 | 185.7 | 198.2 | 202.3 | 213.2 | 210.9 | 208.1 |
