# Supplementary material
Source: publisher figshare collection journal article supplement (https://asha.figshare.com/articles/dataset/_/20304144)
Supplement: Supplementary file 2 [file 1]

**Supplemental Material S1. Core Lexicon checklists for *Good Dog*, *Carl* and *Picnic* developed by frequency and percentage criteria.**

Core lexicon checklists developed by *frequency* criterion for *Good Dog*, *Carl* (nouns)

|    | 20s      | 30s       | 40s       | 50s       | 60s       | 70s       | 80s       |
|----|----------|-----------|-----------|-----------|-----------|-----------|-----------|
| 1  | baby     | baby      | baby      | baby      | baby      | baby      | baby      |
| 2  | dog      | Carl      | Carl      | Carl      | dog       | dog       | dog       |
| 3  | Carl     | dog       | dog       | dog       | Carl      | Carl      | Carl      |
| 4  | mother   | crib      | crib      | bed       | bed       | back      | back      |
| 5  | mom      | mom       | back      | mother    | back      | crib      | bed       |
| 6  | crib     | bed       | bed       | crib      | crib      | bed       | boy       |
| 7  | bed      | back      | mom       | back      | mother    | mother    | mother    |
| 8  | back     | laundry   | laundry   | mom       | mom       | laundry   | crib      |
| 9  | room     | room      | mother    | laundry   | laundry   | window    | window    |
| 10 | laundry  | mother    | milk      | milk      | chute     | milk      | laundry   |
| 11 | mess     | milk      | room      | room      | milk      | powder    | bread     |
| 12 | chute    | time      | chute     | window    | mess      | floor     | milk      |
| 13 | milk     | mess      | window    | mess      | powder    | chute     | powder    |
| 14 | bread    | window    | mess      | chute     | window    | bread     | floor     |
| 15 | home     | bread     | bread     | cookie    | time      | boy       | butter    |
| 16 | window   | cookie    | chocolate | time      | bread     | mess      | chute     |
| 17 | time     | chute     | time      | bread     | floor     | mom       | chocolate |
| 18 | child    | home      | cookie    | powder    | butter    | kitchen   | puff      |
| 19 | butter   | butter    | floor     | kitchen   | cookie    | cookie    | child     |
| 20 | cookie   | kitchen   | kitchen   | floor     | chocolate | butter    | cookie    |
| 21 | bath     | house     | soap      | butter    | aquarium  | chocolate | fish      |
| 22 | kitchen  | chocolate | butter    | chocolate | home      | thing     | head      |
| 23 | grape    | grape     | home      | home      | room      | time      | time      |
| 24 | fishtank | bath      | grape     | grape     | soap      | aquarium  | room      |
| 25 | soap     | floor     | fishtank  | fish      | thing     | puff      | thing     |

Core lexicon checklists developed by *frequency* criterion for *Good Dog, Carl* (verbs)

|    | 20s    | 30s    | 40s    | 50s    | 60s    | 70s    | 80s        |
|----|--------|--------|--------|--------|--------|--------|------------|
| 1  | go         |
| 2  | get        |
| 3  | put    | put    | put    | look   | look   | look   | look       |
| 4  | look   | take   | look   | put    | put    | put    | put        |
| 5  | take   | make   | have   | take   | take   | have   | take       |
| 6  | come   | run    | take   | have   | have   | take   | have       |
| 7  | have   | have   | come   | clean  | come   | come   | come       |
| 8  | play   | come   | play   | come   | run    | see    | play       |
| 9  | make   | decide | run    | play   | play   | clean  | see        |
| 10 | run    | play   | make   | see    | make   | say    | do         |
| 11 | see    | see    | see    | make   | decide | do     | say        |
| 12 | decide | watch  | let    | ride   | say    | know   | clean      |
| 13 | leave  | clean  | know   | say    | see    | turn   | know       |
| 14 | say    | leave  | say    | decide | ride   | find   | watch      |
| 15 | clean  | dance  | clean  | run    | do     | sit    | find       |
| 16 | eat    | jump   | watch  | turn   | find   | make   | straighten |
| 17 | let    | turn   | ride   | dry    | watch  | climb  | make       |
| 18 | turn   | ride   | decide | let    | know   | watch  | ride       |
| 19 | dry    | let    | leave  | leave  | climb  | play   | wash       |
| 20 | do     | dry    | do     | watch  | clean  | decide | give       |
| 21 | know   | say    | open   | know   | let    | dance  | open       |
| 22 | watch  | know   | climb  | eat    | dance  | let    | let        |
| 23 | find   | eat    | find   | swim   | sit    | dry    | climb      |
| 24 | ride   | wash   | lay    | give   | swim   | eat    | guess      |
| 25 | dance  | find   | jump   | climb  | eat    | open   | run        |

Core lexicon checklists developed by *frequency* criterion for *Good Dog, Carl* (adjectives)

|    | 20s       | 30s     | 40s       | 50s       | 60s    | 70s       | 80s       |
|----|-----------|---------|-----------|-----------|--------|-----------|-----------|
| 1  | good      | little  | little    | little    | little | good      | little    |
| 2  | little    | good    | good      | good      | good   | little    | good      |
| 3  | back      | clean   | hungry    | big       | clean  | big       | big       |
| 4  | hungry    | back    | back      | hungry    | big    | next      | next      |
| 5  | big       | hungry  | big       | sure      | dry    | dirty     | happy     |
| 6  | messy     | big     | clean     | messy     | hungry | open      | dirty     |
| 7  | open      | open    | dry       | open      | open   | nice      | nice      |
| 8  | sure      | great   | messy     | next      | happy  | hungry    | great     |
| 9  | own       | sure    | great     | fun       | great  | first     | open      |
| 10 | left      | nice    | sure      | dirty     | next   | old       | old       |
| 11 | dirty     | happy   | dirty     | right     | dirty  | sure      | messy     |
| 12 | happy     | ready   | happy     | left      | left   | wonderful | smart     |
| 13 | nice      | messy   | nice      | ready     | nice   | happy     | sure      |
| 14 | huge      | dirty   | fun       | smart     | old    | great     | right     |
| 15 | next      | tired   | old       | own       | sure   | same      | ready     |
| 16 | right     | left    | next      | great     | first  | messy     | wonderful |
| 17 | able      | next    | ready     | happy     | messy  | right     | left      |
| 18 | hot       | smart   | right     | pretty    | pretty | pretty    | small     |
| 19 | dangerous | first   | first     | nice      | smart  | cute      | wet       |
| 20 | first     | right   | safe      | whole     | soft   | tired     | able      |
| 21 | great     | whole   | whole     | wonderful | tired  | whole     | whole     |
| 22 | long      | awesome | wonderful | close     | able   | close     | close     |
| 23 | ready     | huge    | bad       | excited   | close  | smart     | first     |
| 24 | young     | old     | full      | fine      | full   | innocent  | pretty    |
| 25 | early     | pretty  | gentle    | first     | whole  | own       | different |

Core lexicon checklists developed by *frequency* criterion for *Good Dog, Carl* (adverbs)

|    | 20s      | 30s      | 40s        | 50s      | 60s      | 70s        | 80s      |
|----|----------|----------|------------|----------|----------|------------|----------|
| 1  | then     | then     | then       | then     | then     | then       | then     |
| 2  | back     | back     | back       | back     | back     | back       | back     |
| 3  | there    | all      | there      | there    | there    | there      | there    |
| 4  | just     | there    | up         | up       | all      | all        | all      |
| 5  | all      | up       | all        | all      | up       | just       | up       |
| 6  | where    | upstairs | just       | just     | just     | now        | just     |
| 7  | upstairs | now      | now        | now      | now      | out        | now      |
| 8  | up       | away     | upstairs   | upstairs | out      | up         | out      |
| 9  | out      | where    | out        | out      | upstairs | again      | where    |
| 10 | down     | out      | very       | where    | where    | upstairs   | on       |
| 11 | away     | just     | where      | on       | very     | where      | down     |
| 12 | next     | so       | away       | here     | in       | over       | again    |
| 13 | very     | next     | down       | in       | so       | very       | here     |
| 14 | in       | on       | in         | so       | down     | off        | very     |
| 15 | now      | down     | on         | away     | probably | here       | upstairs |
| 16 | again    | off      | around     | down     | over     | on         | in       |
| 17 | also     | very     | here       | next     | shortly  | in         | so       |
| 18 | around   | in       | over       | shortly  | off      | shortly    | apparent |
| 19 | so       | shortly  | off        | very     | again    | so         | off      |
| 20 | shortly  | sure     | next       | again    | away     | down       | over     |
| 21 | on       | again    | again      | how      | on       | next       | how      |
| 22 | more     | over     | right      | off      | around   | away       | shortly  |
| 23 | how      | really   | apparently | yet      | also     | yet        | around   |
| 24 | once     | around   | shortly    | over     | here     | how        | really   |
| 25 | as       | soon     | together   | sure     | soon     | apparently | away     |

Core lexicon checklists developed by *frequency* criterion for *Good Dog, Carl* (function words)

|    | Age-invariant |
|----|---------------|
| 1  | a             |
| 2  | and           |
| 3  | be            |
| 4  | for           |
| 5  | have          |
| 6  | he            |
| 7  | her           |
| 8  | him           |
| 9  | his           |
| 10 | I             |
| 11 | in            |
| 12 | into          |
| 13 | it            |
| 14 | look          |
| 15 | of            |
| 16 | on            |
| 17 | she           |
| 18 | so            |
| 19 | some          |
| 20 | that          |
| 21 | the           |
| 22 | they          |
| 23 | to            |
| 24 | up            |
| 25 | with          |

Core lexicon checklists developed by *frequency* criterion for *Picnic* (nouns)

|    | 20s       | 30s       | 40s     | 50s       | 60s       | 70s     | 80s        |
|----|-----------|-----------|---------|-----------|-----------|---------|------------|
| 1  | mouse     | mouse     | mouse   | mouse     | mouse     | mouse   | mouse      |
| 2  | family    | picnic    | picnic  | picnic    | picnic    | picnic  | picnic     |
| 3  | picnic    | family    | truck   | truck     | truck     | truck   | truck      |
| 4  | truck     | truck     | family  | family    | family    | road    | road       |
| 5  | baby      | road      | road    | road      | road      | baby    | baby       |
| 6  | road      | baby      | baby    | baby      | baby      | family  | family     |
| 7  | back      | back      | back    | back      | time      | time    | flower     |
| 8  | time      | child     | time    | kid       | flower    | flower  | toy        |
| 9  | child     | time      | berry   | child     | back      | doll    | time       |
| 10 | animal    | girl      | flower  | grandpa   | mom       | back    | back       |
| 11 | kid       | kid       | rat     | mom       | doll      | toy     | mother     |
| 12 | berry     | berry     | child   | flower    | kid       | berry   | food       |
| 13 | flower    | flower    | animal  | raspberry | berry     | child   | basket     |
| 14 | girl      | animal    | rock    | time      | dad       | kid     | picture    |
| 15 | mom       | doll      | food    | animal    | toy       | basket  | thing      |
| 16 | rest      | raspberry | blanket | berry     | grandpa   | water   | baseball   |
| 17 | grass     | grass     | bush    | toy       | child     | grandpa | water      |
| 18 | day       | food      | doll    | dad       | raspberry | bush    | berry      |
| 19 | rock      | baseball  | kid     | doll      | food      | tree    | rock       |
| 20 | raspberry | rock      | day     | blanket   | brother   | thing   | place      |
| 21 | dad       | water     | lake    | grass     | water     | rock    | watermelon |
| 22 | food      | toy       | grass   | food      | baseball  | rest    | doll       |
| 23 | baseball  | lunch     | toy     | grandma   | bush      | place   | home       |
| 24 | way       | mom       | lunch   | day       | blanket   | middle  | banjo      |
| 25 | lake      | bush      | area    | way       | area      | girl    | child      |

Core lexicon checklists developed by *frequency* criterion for *Picnic* (verbs)

|    | 20s    | 30s      | 40s     | 50s      | 60s     | 70s     | 80s    |
|----|--------|----------|---------|----------|---------|---------|--------|
| 1  | go     | go       | go      | go       | go      | go      | go     |
| 2  | get    | get      | look    | look     | look    | look    | have   |
| 3  | have   | see      | get     | get      | have    | have    | look   |
| 4  | look   | have     | have    | have     | get     | get     | get    |
| 5  | start  | find     | play    | play     | play    | play    | play   |
| 6  | eat    | look     | eat     | eat      | find    | eat     | eat    |
| 7  | find   | eat      | find    | see      | eat     | seem    | come   |
| 8  | play   | start    | start   | find     | start   | find    | see    |
| 9  | see    | realize  | see     | start    | see     | sit     | find   |
| 10 | decide | decide   | realize | come     | sit     | come    | sit    |
| 11 | come   | begin    | come    | sit      | come    | start   | know   |
| 12 | call   | come     | sit     | call     | do      | take    | take   |
| 13 | know   | run      | know    | do       | take    | pick    | start  |
| 14 | notice | hear     | run     | decide   | know    | know    | pick   |
| 15 | pick   | know     | call    | pick     | decide  | do      | cry    |
| 16 | do     | fall     | cry     | realize  | cry     | cry     | decide |
| 17 | begin  | take     | do      | know     | pick    | decide  | think  |
| 18 | drive  | do       | take    | take     | run     | lay     | do     |
| 19 | cry    | pick     | drive   | run      | fall    | run     | guess  |
| 20 | run    | continue | fall    | cry      | realize | call    | hug    |
| 21 | take   | sit      | decide  | drive    | drive   | realize | lay    |
| 22 | hear   | give     | pick    | think    | lay     | fall    | fall   |
| 23 | hug    | hit      | lay     | notice   | call    | think   | jump   |
| 24 | fall   | forget   | begin   | hear     | swim    | swim    | swim   |
| 25 | sit    | hug      | notice  | continue | jump    | hear    | put    |

Core lexicon checklists developed by *frequency* criterion for *Picnic* (adjectives)

|    | 20s       | 30s       | 40s       | 50s       | 60s       | 70s       | 80s       |
|----|-----------|-----------|-----------|-----------|-----------|-----------|-----------|
| 1  | little    |
| 2  | stuffed   | stuffed   | stuffed   | stuffed   | happy     | good      | lost      |
| 3  | happy     | missing   | missing   | happy     | good      | happy     | big       |
| 4  | missing   | happy     | red       | missing   | lost      | big       | good      |
| 5  | lost      | pink      | pink      | big       | pink      | lost      | happy     |
| 6  | red       | sad       | happy     | pink      | big       | missing   | ready     |
| 7  | sad       | good      | lost      | good      | missing   | pink      | red       |
| 8  | pink      | big       | good      | sad       | stuffed   | red       | missing   |
| 9  | good      | lost      | big       | lost      | red       | stuffed   | pink      |
| 10 | big       | hungry    | sad       | hungry    | sad       | nice      | poor      |
| 11 | hungry    | ready     | hungry    | ready     | hungry    | sad       | sad       |
| 12 | left      | bumpy     | small     | whole     | whole     | ready     | old       |
| 13 | bumpy     | whole     | left      | full      | great     | old       | bumpy     |
| 14 | ready     | great     | ready     | bumpy     | ready     | poor      | great     |
| 15 | excited   | left      | old       | left      | poor      | great     | nice      |
| 16 | small     | excited   | beautiful | beautiful | beautiful | hungry    | wonderful |
| 17 | scared    | scared    | scared    | wonderful | nice      | bumpy     | beautiful |
| 18 | old       | old       | nice      | poor      | old       | whole     | whole     |
| 19 | same      | own       | whole     | old       | young     | left      | hungry    |
| 20 | beautiful | young     | young     | great     | bumpy     | full      | stuffed   |
| 21 | own       | small     | great     | small     | left      | young     | glad      |
| 22 | whole     | beautiful | excite    | nice      | full      | beautiful | pretty    |
| 23 | glad      | high      | bumpy     | tall      | tall      | small     | next      |
| 24 | long      | nearby    | poor      | lonely    | wonderful | wonderful | full      |
| 25 | nice      | nice      | full      | scared    | aware     | glad      | small     |



Core lexicon checklists developed by *frequency* criterion for *Picnic* (adverbs)

|    | 20s       | 30s       | 40s      | 50s       | 60s       | 70s       | 80s        |
|----|-----------|-----------|----------|-----------|-----------|-----------|------------|
| 1  | all       | back      | all      | all       | all       | all       | there      |
| 2  | back      | all       | back     | back      | there     | there     | all        |
| 3  | there     | there     | there    | there     | back      | back      | then       |
| 4  | then      | then      | then     | then      | just      | out       | back       |
| 5  | just      | out       | just     | where     | so        | then      | out        |
| 6  | meanwhile | where     | where    | out       | then      | now       | just       |
| 7  | out       | up        | out      | meanwhile | out       | where     | where      |
| 8  | where     | meanwhile | very     | just      | very      | up        | still      |
| 9  | very      | just      | up       | so        | where     | so        | so         |
| 10 | still     | so        | still    | very      | up        | still     | up         |
| 11 | so        | still     | so       | up        | around    | very      | here       |
| 12 | up        | around    | around   | around    | still     | just      | now        |
| 13 | around    | very      | here     | still     | meanwhile | around    | around     |
| 14 | finally   | now       | now      | now       | maybe     | here      | very       |
| 15 | together  | together  | together | here      | now       | meanwhile | on         |
| 16 | alone     | here      | again    | together  | here      | again     | meanwhile  |
| 17 | now       | finally   | finally  | finally   | together  | maybe     | down       |
| 18 | really    | behind    | alone    | maybe     | finally   | suddenly  | even       |
| 19 | off       | alone     | behind   | behind    | even      | off       | maybe      |
| 20 | maybe     | down      | off      | down      | down      | down      | off        |
| 21 | again     | again     | suddenly | really    | really    | meantime  | again      |
| 22 | behind    | once      | away     | even      | off       | finally   | apparently |
| 23 | even      | even      | down     | again     | again     | even      | along      |
| 24 | here      | really    | on       | off       | on        | together  | away       |
| 25 | away      | on        | probably | alone     | probably  | on        | ever       |

Core lexicon checklists developed by *frequency* criterion for *Picnic* (function words)

|    | Age-invariant |
|----|---------------|
| 1  | a             |
| 2  | all           |
| 3  | and           |
| 4  | be            |
| 5  | for           |
| 6  | he            |
| 7  | her           |
| 8  | him           |
| 9  | his           |
| 10 | in            |
| 11 | it            |
| 12 | look          |
| 13 | of            |
| 14 | on            |
| 15 | one           |
| 16 | she           |
| 17 | so            |
| 18 | some          |
| 19 | that          |
| 20 | the           |
| 21 | their         |
| 22 | them          |
| 23 | they          |
| 24 | to            |
| 25 | with          |

Core lexicon checklists developed by *percentage* criterion for *Good Dog, Carl* (nouns)

|    | 20s       | 30s          | 40s          | 50s          | 60s          | 70s          | 80s       |
|----|-----------|--------------|--------------|--------------|--------------|--------------|-----------|
| 1  | laundry   | bed          | bed          | bed          | bed          | baby         | back      |
| 2  | baby      | Carl         | dog          | dog          | Carl         | Carl         | bread     |
| 3  | bed       | baby         | Carl         | Carl         | laundry      | bed          | dog       |
| 4  | Carl      | dog          | baby         | laundry      | dog          | dog          | Carl      |
| 5  | dog       | laundry      | laundry      | baby         | baby         | laundry      | laundry   |
| 6  | crib      | crib         | grape        | chute        | back         | back         | baby      |
| 7  | grape     | grape        | crib         | grape        | chute        | grape        | bed       |
| 8  | bread     | cookie       | back         | cookie       | grape        | bread        | grape     |
| 9  | mess      | butter       | chute        | milk         | bread        | crib         | butter    |
| 10 | milk      | bread        | cookie       | bread        | milk         | window       | window    |
| 11 | butter    | mess         | milk         | mess         | butter       | mess         | mother    |
| 12 | room      | milk         | mess         | butter       | crib         | chute        | chute     |
| 13 | chute     | room         | bread        | back         | cookie       | milk         | crib      |
| 14 | cookie    | chocolate    | butter       | crib         | floor        | butter       | milk      |
| 15 | back      | back         | chocolate    | window       | mess         | cookie       | powder    |
| 16 | bath      | chute        | window       | room         | window       | floor        | floor     |
| 17 | music     | window       | room         | chocolate    | basement     | powder       | cookie    |
| 18 | window    | bath         | soap         | mother       | kitchen      | chocolate    | head      |
| 19 | chocolate | refrigerator | time         | music        | soap         | kitchen      | fish      |
| 20 | soap      | time         | kitchen      | basement     | chocolate    | jar          | jar       |
| 21 | mom       | soap         | refrigerator | bath         | powder       | mother       | syrup     |
| 22 | mother    | syrup        | house        | syrup        | refrigerator | room         | chocolate |
| 23 | fishtank  | house        | music        | kitchen      | syrup        | syrup        | room      |
| 24 | kitchen   | mom          | syrup        | time         | time         | music        | kitchen   |
| 25 | stair     | kitchen      | basement     | fish         | aquarium     | head         | mess      |
| 26 | syrup     | stair        | bath         | powder       | music        | puff         | basement  |
| 27 | basement  | floor        | floor        | floor        | room         | aquarium     | puff      |
| 28 | house     | play         | stair        | refrigerator | mother       | dresser      | soap      |
| 29 | time      | basement     | fishtank     | aquarium     | dresser      | refrigerator | thing     |
| 30 | play      | mother       | mom          | jar          | bath         | soap         | water     |
| 31 |           | fishtank     | powder       | soap         | stair        | basement     | time      |
| 32 |           | bedroom      | jewelry      | house        | bedroom      | bedroom      | bedroom   |

|    |       |         |       |       |       |       |
|----|-------|---------|-------|-------|-------|-------|
| 33 | music | bedroom | stair | thing | thing | music |
| 34 |       |         | mom   | jar   | time  | loaf  |
| 35 |       |         | ride  | puff  | stair | bath  |
| 36 |       |         | water | water | water | top   |
| 37 |       |         | thing | house |       |       |

---

Core lexicon checklists developed by *percentage* criterion for *Good Dog, Carl* (verbs)

|    | 20s    | 30s    | 40s    | 50s   | 60s    | 70s   | 80s   |
|----|--------|--------|--------|-------|--------|-------|-------|
| 1  | get    | clean  | go     | go    | go     | go    | go    |
| 2  | clean  | make   | get    | get   | look   | put   | put   |
| 3  | go     | get    | put    | put   | take   | look  | look  |
| 4  | take   | go     | look   | look  | have   | take  | take  |
| 5  | put    | put    | clean  | clean | put    | come  | come  |
| 6  | look   | run    | have   | take  | come   | get   | get   |
| 7  | make   | look   | take   | come  | dry    | clean | have  |
| 8  | come   | see    | make   | have  | clean  | see   | say   |
| 9  | see    | come   | see    | make  | get    | have  | see   |
| 10 | run    | have   | come   | run   | run    | dry   | run   |
| 11 | leave  | leave  | run    | say   | make   | say   | open  |
| 12 | say    | take   | leave  | turn  | see    | run   | clean |
| 13 | dry    | dry    | say    | dry   | say    | make  | do    |
| 14 | have   | decide | turn   | play  | climb  | open  | make  |
| 15 | decide | say    | watch  | leave | open   | turn  | dry   |
| 16 | eat    | watch  | decide |       | decide | climb | know  |
| 17 | play   | play   | climb  |       | turn   | find  | turn  |
| 18 | jump   | turn   | jump   |       | find   | leave | climb |
| 19 | turn   | push   |        |       |        |       |       |
| 20 | watch  |        |        |       |        |       |       |

Core lexicon checklists developed by *percentage* criterion for *Good Dog, Carl* (adjectives)

|   | 20s    | 30s    | 40s    | 50s    | 60s    | 70s    | 80s    |
|---|--------|--------|--------|--------|--------|--------|--------|
| 1 | good   |
| 2 | little | back   | little | little | back   | back   | little |
| 3 | back   | little | hungry | back   | little | little | back   |
| 4 |        | hungry | back   |        |        |        |        |

Core lexicon checklists developed by *percentage* criterion for *Good Dog, Carl* (adverbs)

|    | 20s      | 30s      | 40s      | 50s      | 60s      | 70s      | 80s      |
|----|----------|----------|----------|----------|----------|----------|----------|
| 1  | then     | back     | up       | up       | back     | back     | up       |
| 2  | up       | up       | then     | back     | out      | up       | then     |
| 3  | out      | then     | back     | out      | up       | then     | out      |
| 4  | down     | out      | down     | then     | then     | out      | back     |
| 5  | upstairs | over     | upstairs | down     | down     | over     | down     |
| 6  | just     | upstairs | all      | on       | over     | on       | on       |
| 7  | in       | down     | over     | over     | upstairs | off      | there    |
| 8  | on       | away     | on       | upstairs | off      | down     | off      |
| 9  | so       | on       | in       | off      | on       | all      | over     |
| 10 | off      | all      | off      | all      | all      | there    | all      |
| 11 | over     | off      | just     | in       | there    | so       | in       |
| 12 | all      |          |          | shortly  | in       | upstairs | so       |
| 13 |          |          |          | there    | so       | in       | upstairs |
| 14 |          |          |          |          | just     |          | just     |
| 15 |          |          |          |          | shortly  |          |          |

Core lexicon checklists developed by *percentage* criterion for *Good Dog, Carl* (function words)

|    | Age-invariant |
|----|---------------|
| 1  | and           |
| 2  | the           |
| 3  | in            |
| 4  | on            |
| 5  | and           |
| 6  | be            |
| 7  | to            |
| 8  | they          |
| 9  | of            |
| 10 | he            |
| 11 | with          |
| 12 | up            |
| 13 | into          |
| 14 | some          |
| 15 | for           |
| 16 | she           |
| 17 | down          |
| 18 | so            |
| 19 | out           |
| 20 | him           |
| 21 | at            |
| 22 | I             |
| 23 | after         |
| 24 | not           |
| 25 | all           |
| 26 | by            |
| 27 | over          |



Core lexicon checklists developed by *percentage* criterion for *Picnic* (nouns)

|    | 20s      | 30s      | 40s      | 50s      | 60s      | 70s     | 80s        |
|----|----------|----------|----------|----------|----------|---------|------------|
| 1  | picnic   | picnic   | picnic   | picnic   | picnic   | picnic  | picnic     |
| 2  | truck    | truck    | truck    | truck    | truck    | truck   | truck      |
| 3  | mouse    | family   | road     | family   | family   | road    | mouse      |
| 4  | family   | mouse    | mouse    | mouse    | mouse    | mouse   | road       |
| 5  | road     | road     | family   | road     | road     | family  | time       |
| 6  | time     | time     | back     | back     | time     | flower  | family     |
| 7  | baseball | baseball | rock     | baseball | flower   | time    | flower     |
| 8  | flower   | flower   | time     | time     | baseball | picture | baseball   |
| 9  | child    | rock     | flower   | baby     | baby     | back    | basket     |
| 10 | play     |          | baseball | flower   | picture  | basket  | picture    |
| 11 | back     |          | bush     | blanket  | rock     | rock    | toy        |
| 12 |          |          |          | child    |          | bush    | watermelon |
| 13 |          |          |          | grass    |          | toy     | food       |
| 14 |          |          |          | rock     |          | tree    | back       |
| 15 |          |          |          | basket   |          |         | water      |
| 16 |          |          |          | play     |          |         | rock       |
| 17 |          |          |          |          |          |         | baby       |

Core lexicon checklists developed by *percentage* criterion for *Picnic* (verbs)

|    | 20s     | 30s     | 40s     | 50s     | 60s     | 70s     | 80s    |
|----|---------|---------|---------|---------|---------|---------|--------|
| 1  | go      | look    | get     | get     | go      | go      | go     |
| 2  | eat     | see     | go      | have    | get     | get     | get    |
| 3  | find    | go      | find    | find    | find    | have    | see    |
| 4  | get     | find    | look    | go      | have    | look    | find   |
| 5  | have    | eat     | start   | look    | see     | see     | look   |
| 6  | see     | realize | have    | see     | look    | find    | come   |
| 7  | start   | start   | realize | eat     | start   | eat     | eat    |
| 8  | fall    | have    | see     | start   | fall    | fall    | fall   |
| 9  | hear    | fall    | eat     | fall    | decide  | come    | know   |
| 10 | realize | get     | fall    | realize | eat     | start   | start  |
| 11 | decide  | decide  | come    | decide  | come    | decide  | pick   |
| 12 | look    | come    | decide  | do      | realize | hear    | decide |
| 13 | come    | hear    | hear    | come    | hear    | know    |        |
| 14 | run     | leave   | run     | hear    | do      | realize |        |
| 15 |         | run     | hit     | run     | pick    | think   |        |
| 16 |         |         |         | hit     |         | do      |        |
| 17 |         |         |         |         |         | hit     |        |

Core lexicon checklists developed by *percentage* criterion for *Picnic* (adjectives)

|   | 20s    | 30s    | 40s    | 50s    | 60s    | 70s    | 80s    |
|---|--------|--------|--------|--------|--------|--------|--------|
| 1 | little |
| 2 | happy  | happy  | happy  | happy  | happy  | happy  | big    |
| 3 | sad    | sad    | ready  | ready  | good   | ready  | good   |
| 4 |        |        | good   |        |        | big    | happy  |
| 5 |        |        |        |        |        | good   | ready  |

Core lexicon checklists developed by *percentage* criterion for *Picnic* (adverbs)

|    | 20s       | 30s       | 40s    | 50s       | 60s    | 70s    | 80s    |
|----|-----------|-----------|--------|-----------|--------|--------|--------|
| 1  | out       | back      | back   | back      | out    | back   | out    |
| 2  | back      | up        | up     | out       | back   | up     | back   |
| 3  | up        | around    | all    | up        | there  | all    | up     |
| 4  | all       | then      | around | all       | up     | there  | all    |
| 5  | then      | all       | there  | around    | then   | then   | there  |
| 6  | around    | so        | so     | so        | around | so     | then   |
| 7  | so        | just      | then   | then      | so     | around | around |
| 8  | there     | there     | still  | there     | just   | down   | on     |
| 9  | meanwhile | still     | on     | meanwhile | all    | still  | so     |
| 10 | just      | meanwhile | down   | down      | still  | on     | down   |
| 11 | off       |           | just   | just      | on     | just   | still  |
| 12 | still     |           | very   | on        | down   | now    | just   |
| 13 |           |           |        | still     | off    | off    | off    |
| 14 |           |           |        |           |        |        | now    |

Core lexicon checklists developed by *percentage* criterion for *Picnic* (function words)

|    | Age-invariant |
|----|---------------|
| 1  | and           |
| 2  | a             |
| 3  | the           |
| 4  | be            |
| 5  | of            |
| 6  | they          |
| 7  | in            |
| 8  | to            |
| 9  | on            |
| 10 | for           |
| 11 | with          |
| 12 | not           |
| 13 | so            |
| 14 | some          |
| 15 | at            |
| 16 | all           |
| 17 | them          |
| 18 | into          |
| 19 | but           |
| 20 | up            |
| 21 | he            |
| 22 | one           |
| 23 | him           |
| 24 | she           |
| 25 | down          |
| 26 | because       |
| 27 | I             |
